# Supplementary material
Source: Research Square preprint supplement (doi:10.21203/rs.3.rs-8812194/v1)
Supplement: Supplementary file 1 [file 96f84013e77c6cf9fcc2e003.docx]

Table S1: Summary of Interview Guidelines for Patients with DLSS

| Section & Aim | Core Questions | Probes & Follow-ups |
| --- | --- | --- |
| **I. Introduction & Warm-up** Establish rapport, explain purpose, obtain consent. | 1. Thank you for your time. Today, we’d like to understand your experiences and thoughts about managing your back and leg condition (lumbar spinal stenosis). 2. The interview will focus on your views and decisions about treatment options, especially those from Traditional Chinese Medicine (TCM), like acupuncture or tuina. 3. There are no right or wrong answers. We are interested in your personal perspective. 4. The interview will be audio-recorded for accuracy, and all information will be kept strictly confidential and anonymous. 5. Do you have any questions before we begin? | (Obtain verbal consent to proceed and record). |
| **II. Illness Narrative & Treatment History** Understand the patient's journey and past experiences. | 1. Could you tell me about your back/leg problem? 2. What treatments have you tried for this condition so far? 3. What was your experience with those treatments? | • When did it start, and how does it affect your daily life? • Probe: medication, physiotherapy, injections, surgery, TCM, etc. • What worked, what didn’t, and why? |
| **III. Perceptions & Knowledge of TCM** Explore baseline awareness, attitudes, and understanding. | 1. When you think about treatments like acupuncture, tuina, cupping or Chinese herbal medicine for back problems, what comes to your mind? 2. What have you heard, read, or experienced personally about how effective or safe these TCM treatments are? 3. How do you think treatments like acupuncture might work for a condition like yours? | • Probe for sources of information (e.g., family, media, doctor). • Probe for positive, negative, or neutral associations. • Probe understanding of mechanism or rationale. |
| **IV. Decision-Making Process & Weighing Factors** |  |  |
| *Capability (Knowledge/Skills)* | 1. If a doctor suggested a TCM treatment plan to you, what would you need to know or understand to feel comfortable trying it? 2. What questions or uncertainties would you have before starting? | • “What information would be most important for you?” • “Is there anything that seems confusing or hard to understand about it?” |
| *Opportunity (Context/Circumstances)* | 1. How would factors like the **cost** of treatment, the **time** needed for frequent visits, or the **travel distance** to the clinic influence your decision? 2. Have the experiences or opinions of family, friends, or other patients influenced your views on TCM? | • “Could you describe how you would manage these practical aspects?” • “Can you give me an example of how someone else’s experience affected your thinking?” |
| *Motivation (Beliefs/Emotions)* | 1. What aspects of TCM might make you feel **positive or eager** to try it? 2. What aspects might make you feel **hesitant, worried, or reluctant**? 3. How do you view the role of surgery versus treatments like TCM for your condition in the long term? | • Probe: desire to avoid surgery, trust in natural methods, cultural comfort. • Probe: fear of needles/pain, concern about side effects, doubts about scientific proof. • “What are your thoughts on when each type of treatment might be appropriate?” |
| **V. Expectations & Ideal Care Scenario** Identify patient-centered goals and ideal communication. | 1. What would a **successful** TCM treatment experience look like for you? 2. How would you like your doctor to **communicate with you** about different treatment options, including TCM? 3. What could a hospital or clinic do to make it easier for patients like you to consider and stick with a TCM treatment plan? | • Probe: goals for pain reduction, improved function, overall well-being. • “What kind of language or details are helpful?” • Probe for service model suggestions (e.g., scheduling, follow-up). |
| **VI. Closing** Ensure completeness and respect. | 1. Is there anything important about your experience or decision-making that we haven’t discussed that you’d like to add? 2. Do you have any final questions for me? 3. Thank you for sharing your valuable perspective and time. |  |

(Interviewer Note: Use this guide flexibly as a framework. Follow the participant’s lead and narrative flow. Actively listen and use probing questions such as “Can you tell me more about that?” “Why do you feel that way?” “Can you give me a specific example?” to explore responses in depth and gather rich, detailed data.)

### Table S2. COREQ 32 checklist

| Topic | Item No. | Guide Questions/Description | Reported on Page No./line No. |
| --- | --- | --- | --- |
| **Domain 1: Research team and reflexivity** |  |  |  |
| Interviewer/facilitator | 1 | Which author/s conducted the interview or focus group? | 2.2: Zhou Yanji (Z.Y.J.) and An Yi (A.Y.) |
| Credentials | 2 | What were the researcher’s credentials? E.g. PhD, MD | 2.2: Z.Y.J.: Master's in TCM; A.Y.: Master's in acupuncture and tuina |
| Occupation | 3 | What was their occupation at the time of the study? | 2.2: Researchers (not involved in clinical care) |
| Gender | 4 | Was the researcher male or female? | 2.2: Z.Y.J.: female; A.Y.: male |
| Experience and training | 5 | What experience or training did the researcher have? | 2.2: Z.Y.J.: 8 years qualitative research experience; A.Y.: 5 years clinical research experience |
| Relationship established | 6 | Was a relationship established prior to study commencement? | 2.2: No, interviewers were not involved in clinical care |
| Participant knowledge of the interviewer | 7 | What did the participants know about the researcher? | 2.2: They were informed interviewers were researchers focusing on patient experience |
| Interviewer characteristics | 8 | What characteristics were reported about the interviewer/facilitator? | 2.4: Reflexivity discussed; researchers maintained reflective journals |
| **Domain 2: Study design** |  |  |  |
| Methodological orientation and Theory | 9 | What methodological orientation was stated to underpin the study? | Abstract & 2.: Qualitative descriptive study; inductive thematic analysis |
| Sampling | 10 | How were participants selected? | 2.1: Purposive sampling with maximum variation strategy |
| Method of approach | 11 | How were participants approached? | 2.1: Referrals by clinicians and outpatient advertisements |
| Sample size | 12 | How many participants were in the study? | 2.1: 26 participants |
| Non-participation | 13 | How many people refused to participate or dropped out? Reasons? | 2.2: 19 refused; reasons: lack of time (n=11), disinterest (n=8) |
| Setting of data collection | 14 | Where was the data collected? | 2.2: Private, quiet consultation room at the hospital |
| Presence of non-participants | 15 | Was anyone else present besides the participants and researchers? | 2.2: Only interviewer and participant |
| Description of sample | 16 | What are the important characteristics of the sample? | 3.1 & Table S3 (Supplementary): Age, gender, disease duration, education, etc. |
| Interview guide | 17 | Were questions, prompts, guides provided by the authors? Was it pilot tested? | 2.2: Guide developed from literature & expertise; piloted with 2 patients |
| Repeat interviews | 18 | Were repeat interviews carried out? If yes, how many? | Not mentioned (N/A) |
| Audio/visual recording | 19 | Did the research use audio or visual recording to collect the data? | 2.2: Audio-recorded digitally with permission |
| Field notes | 20 | Were field notes made during and/or after the interview or focus group? | 2.2: Brief field notes taken during interviews |
| Duration | 21 | What was the duration of the interviews or focus group? | 2.2: 30–45 minutes |
| Data saturation | 22 | Was data saturation discussed? | 2.4: Yes, discussed; saturation reached after 22nd interview |
| Transcripts returned | 23 | Were transcripts returned to participants for comment and/or correction? | Not mentioned (N/A) |
| **Domain 3: analysis and findings** |  |  |  |
| Number of data coders | 24 | How many data coders coded the data? | 2.3 & 2.4: Two primary coders (ZYJ & AY); third reviewer (W.X.Y.) |
| Description of the coding tree | 25 | Did authors provide a description of the coding tree? | 2.3: Phases of thematic analysis described; coding framework developed |
| Derivation of themes | 26 | Were themes identified in advance or derived from the data? | 2.3: Inductive thematic analysis; themes derived from data |
| Software | 27 | What software, if applicable, was used to manage the data? | 2.3: NVivo 12 |
| Participant checking | 28 | Did participants provide feedback on the findings? | Not mentioned (N/A) |
| Quotations presented | 29 | Were participant quotations presented to illustrate the themes/findings? Was each quotation identified? | 3.2 & Table 1：Yes, each quote identified with participant ID (e.g., P07) |
| Data and findings consistent | 30 | Was there consistency between the data presented and the findings? | Throughout results & discussion; quotes support themes clearly |
| Clarity of major themes | 31 | Were major themes clearly presented in the findings? | 3.2: Two major themes (Barriers & Facilitators) with sub-themes |
| Clarity of minor themes | 32 | Is there a description of diverse cases or discussion of minor themes? | 3.2.3: Interrelationships between sub-themes discussed |

Table S3

| ID | sex | Age (years) | Duration (years) | Education level | Professional Background |
| --- | --- | --- | --- | --- | --- |
| P01 | female | 73 | 10 | junior middle school | retired worker |
| P02 | female | 66 | 3 | primary school | farmer |
| P03 | male | 69 | 2 | technical secordary school | retired technician |
| P04 | female | 71 | 9 | undergraduate course | retired teacher |
| P05 | male | 58 | 8 | undergraduate course | Active-duty personnel |
| P06 | male | 73 | 11 | technical secordary school | retired workers |
| P07 | female | 64 | 7 | junior college | retirement accountant |
| P08 | female | 63 | 3 | junior college | Retired employee |
| P09 | male | 68 | 6 | senior middle school | retire |
| P10 | female | 55 | 7 | undergraduate course | In-service teacher |
| P11 | female | 75 | 13 | primary school | retire |
| P12 | male | 62 | 5 | postgraduate | in-service engineer |
| P13 | female | 59 | 4 | senior middle school | retired workers |
| P14 | male | 70 | 9 | junior middle school | retire |
| P15 | female | 56 | 6 | undergraduate course | Active physician |
| P16 | male | 67 | 8 | junior college | retired cadre |
| P17 | female | 61 | 5 | postgraduate | Retired Professor |
| P18 | male | 72 | 12 | primary school | farmer |
| P19 | female | 54 | 4 | technical secordary school | nurse |
| P20 | male | 65 | 7 | senior middle school | retired workers |
| P21 | female | 57 | 5 | undergraduate course | public servant |
| P22 | male | 63 | 6 | junior middle school | retired driver |
| P23 | female | 60 | 5 | junior college | Retired employee |
| P24 | male | 59 | 4 | technical secordary school | in-service technician |
| P25 | female | 68 | 10 | primary school | retire |
| P26 | male | 71 | 11 | senior middle school | retired workers |
